# Supplementary material
Source: publisher figshare collection journal article supplement (https://tandf.figshare.com/articles/dataset/_/8188601)
Supplement: Supplementary file 1 [file 1]

# Figure S3

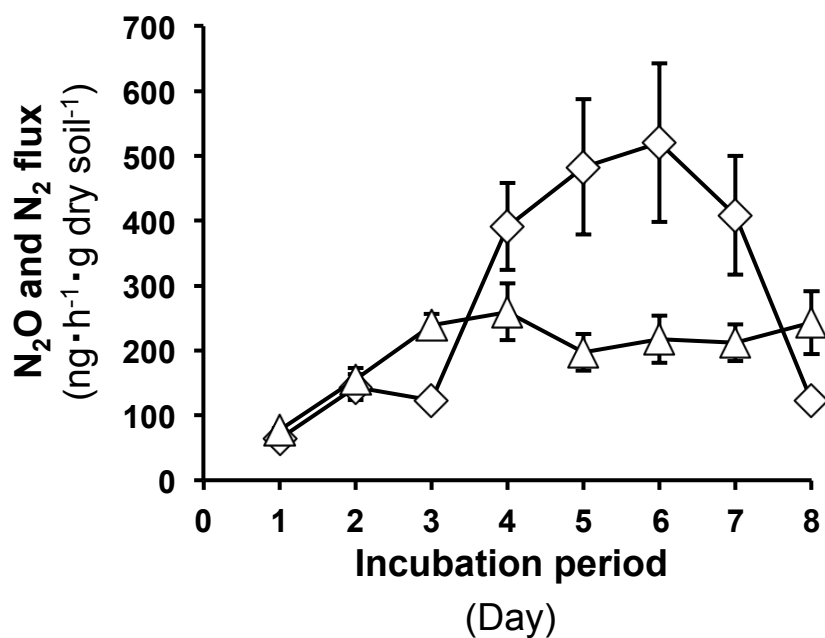

Figure S3

Changes of N<sub>2</sub>O fluxes (diamonds) and N<sub>2</sub> fluxes (triangles) from soil microcosm. Symbols are means (n=3) with vertical error bars.
