# Supplementary material
Source: publisher figshare collection journal article supplement (https://tandf.figshare.com/articles/dataset/_/8188601)
Supplement: Supplementary file 3 [file 1]

## Figure S2

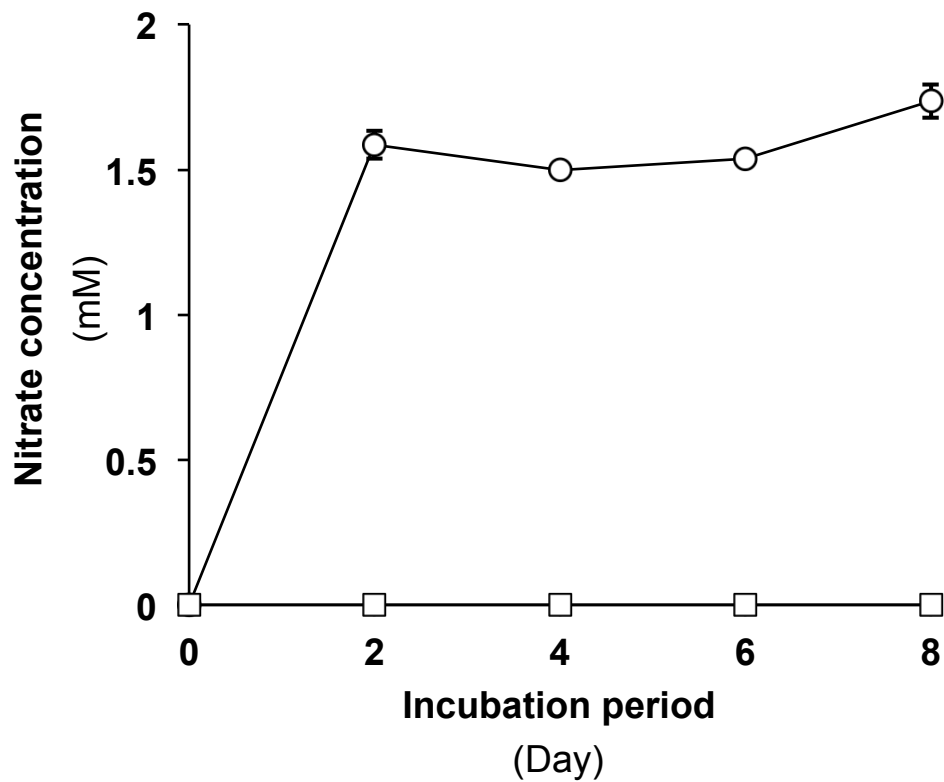

Figure S2

Transition of the concentrations of nitrate in outflow solution of nitrate added (circles) and control soil microcosms (squares) during incubation period. Symbols are means ( $n=3$ ) with vertical error bars.
