# Supplementary material
Source: publisher figshare collection journal article supplement (https://tandf.figshare.com/articles/dataset/_/8188601)
Supplement: Supplementary file 4 [file 1]

Archive with 9 entries (9 files):
- tssp_a_1622401_sm3448.docx
- tssp_a_1622401_sm3447.docx
- tssp_a_1622401_sm3446.docx
- tssp_a_1622401_sm3445.docx
- tssp_a_1622401_sm3444.docx
- tssp_a_1622401_sm3443.docx
- tssp_a_1622401_sm3442.pdf
- tssp_a_1622401_sm3441.pdf
- tssp_a_1622401_sm3440.pdf
