# Supplementary material
Source: publisher figshare collection journal article supplement (https://tandf.figshare.com/articles/dataset/_/8188601)

**Figure S1**

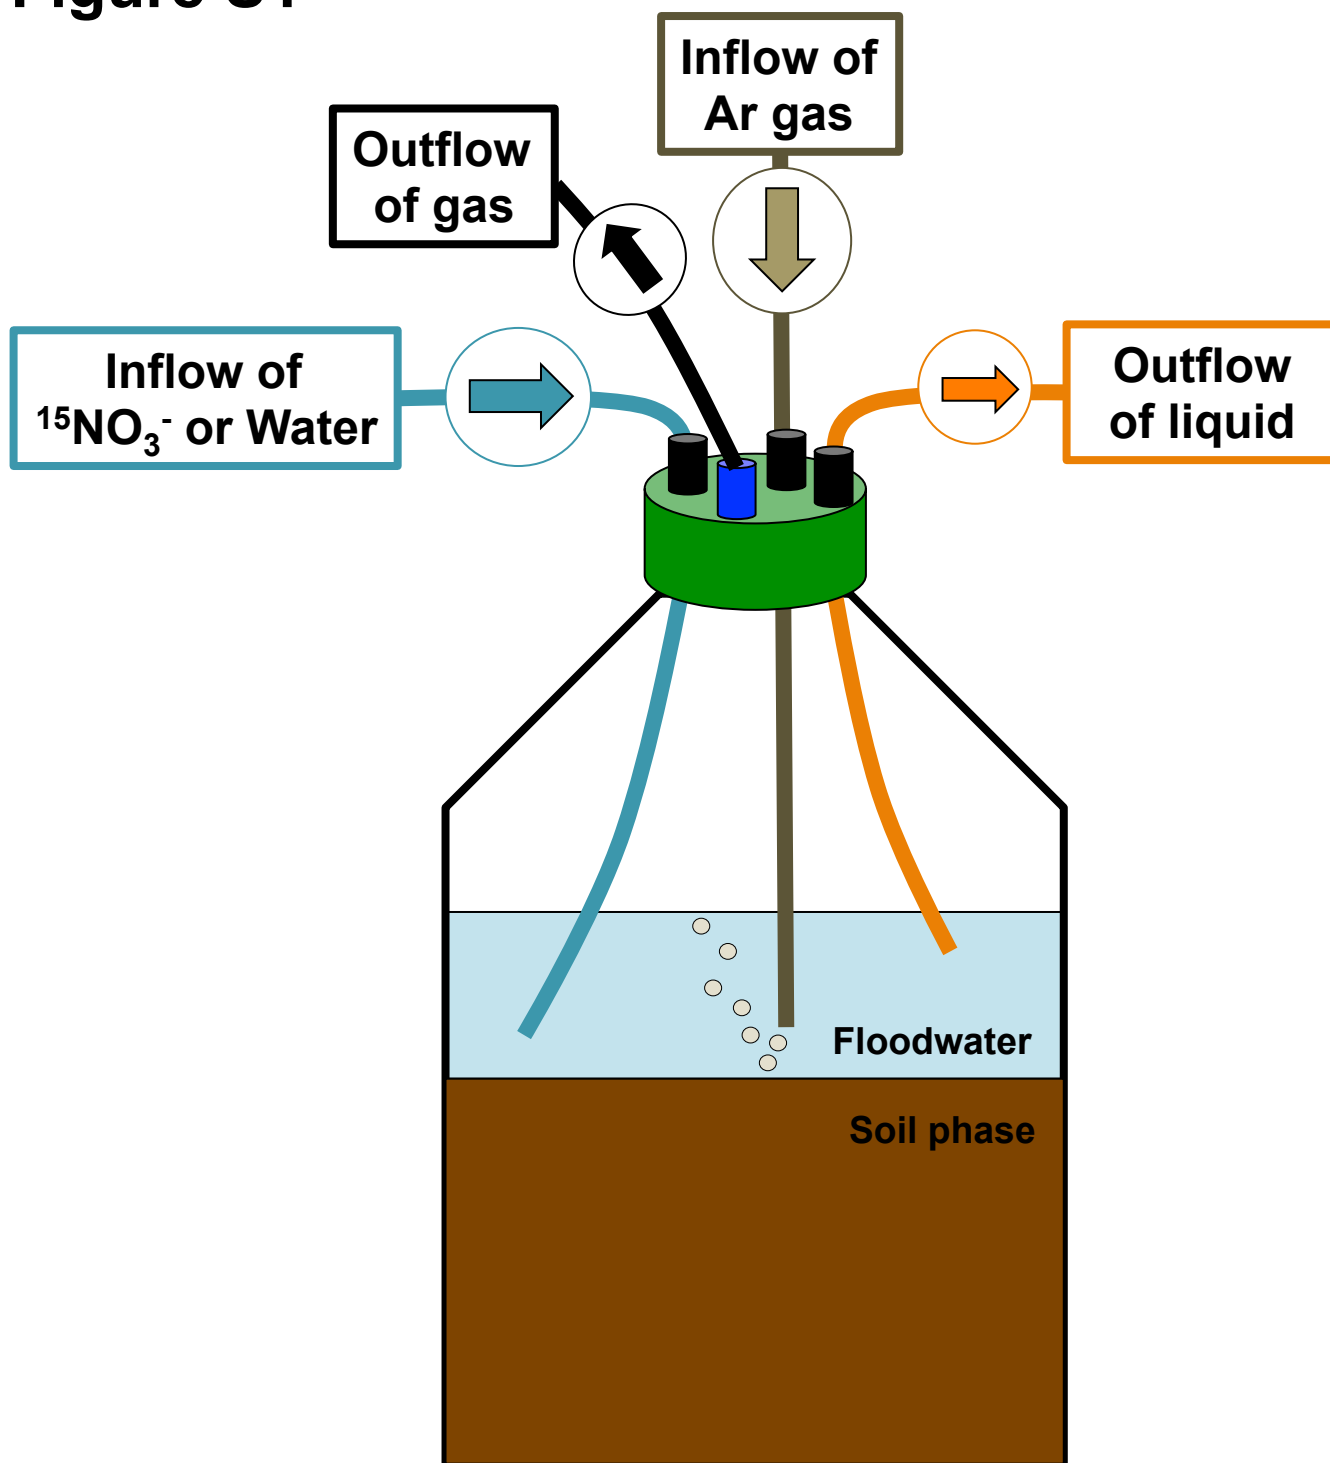

Figure S1  
Schematic figure of the microcosm in this study.

Supplement: Supplementary file 2 [file 1]

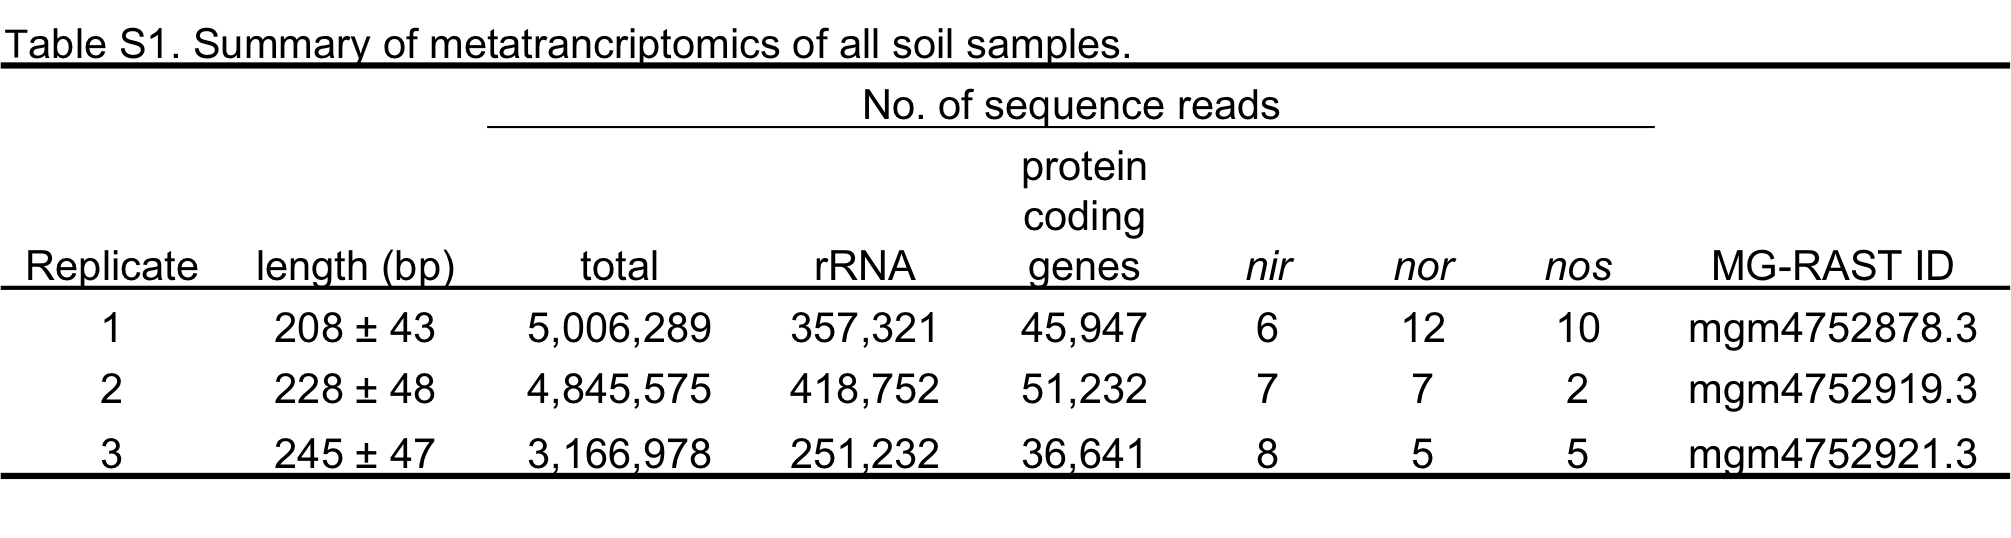

Supplement: Supplementary file 4 [file 1 › tssp_a_1622401_sm3443.docx]
